# Supplementary material
Source: publisher figshare collection journal article supplement (https://acs.figshare.com/ndownloader/files/21680658)
Supplement: Supplementary file 1 [file 21680658]

## **Supporting Information**

**for**

### **Synthesis, Structure, and Reactivity of Dicationic Bimetallic Tetrabenzoyldihafnium Complexes Bearing a Chelating (2-Hydroxyethyl)amido Ligand**

Mariko Inoue, Michael J. Lopez, Hayato Tsurugi,\* and Kazushi Mashima\*

*Department of Chemistry, Graduate School of Engineering Science, Osaka University,  
Toyonaka, Osaka 560-8531, Japan*

- 1. X-Ray Crystallographic Analysis**
- 2.  $^1\text{H}$  and  $^{13}\text{C}\{^1\text{H}\}$  NMR Spectra of (2-Hydroxyethylene)amine**
- 3.  $^1\text{H}$  and  $^{13}\text{C}\{^1\text{H}\}$  NMR Spectra of Hafnium Complexes**
- 4. Screening of Reaction Condition for Oligomerization of 1-Hexene;  $^1\text{H}$  and  $^{13}\text{C}\{^1\text{H}\}$  NMR Spectra of Oligomer of 1-hexene**
- 5.  $^1\text{H}$  and  $^{13}\text{C}\{^1\text{H}\}$  NMR Spectra of Alkene 3**

## 1. X-ray Crystallographic Analysis

The crystals were mounted on the CryoLoop (Hampton Reserch Corp) with a layer of light mineral oil and placed in a nitrogen stream at 113(1) K. All measurements were made on Rigaku Xtalab P200 diffractometer using multi-layer mirror monochromated Mo-K $\alpha$  (0.71075 Å) radiation. The structure was solved by SIR92,<sup>S1</sup> SHELXT Version 2014/5<sup>S2</sup> in the CrystalClear program,<sup>S3</sup> and refined on  $F^2$  by full-matrix least-squares method, using SHELXL-2016/4.<sup>S4</sup> Non-hydrogen atoms were anisotropically refined, except for one carbon atom of B(C<sub>6</sub>F<sub>5</sub>)<sub>4</sub> for **5a**. H-atoms were included in the refinement on calculated positions riding on their carrier atoms. A bromine atom of the packing solvent in complex **2a** was disordered due to thermal motion, resulted in the remaining of large electron density around the bromine atom. Large residual electron density was found closed to the heavy hafnium atom for **1a** and **5a**. The function minimized was  $[\sum w(F_o^2 - F_c^2)^2]$  ( $w = 1/[\sigma^2(F_o^2) + (aP)^2 + bP]$ ), where  $P = (\max(F_o^2, 0) + 2F_c^2) / 3$  with  $\sigma^2(F_o^2)$  from countin statistics. The functions  $R1$  and  $wR2$  were  $(\sum ||F_o| - |F_c||) / \sum |F_o|$  and  $[\sum w(F_o^2 - F_c^2)^2 / \sum (wF_o^4)]^{1/2}$ , respectively. The PLATON/SQUEEZE program<sup>S5</sup> was used for the refinement of **5a** and **6a**. Crystal data and structure refinement parameters are listed in Table S1 and S2. The ORTEP-3 program<sup>S6</sup> was used to draw the molecules.

**Table S1.** Crystal Data and Data Collection Parameters of Complexes **1a** and **2a**

|                                                                  | <b>1a</b>                                                                     | <b>2a</b>                                                                                                                     |
|------------------------------------------------------------------|-------------------------------------------------------------------------------|-------------------------------------------------------------------------------------------------------------------------------|
| empirical formula                                                | C <sub>76</sub> H <sub>94</sub> Hf <sub>2</sub> N <sub>2</sub> O <sub>2</sub> | C <sub>122</sub> H <sub>90</sub> B <sub>2</sub> Br <sub>2</sub> F <sub>40</sub> Hf <sub>2</sub> N <sub>2</sub> O <sub>2</sub> |
| formula weight                                                   | 1424.57                                                                       | 2914.41                                                                                                                       |
| crystal system                                                   | <i>monoclinic</i>                                                             | <i>triclinic</i>                                                                                                              |
| space group                                                      | <i>P</i> 2 <sub>1</sub> / <i>c</i> (No. 14)                                   | <i>P</i> $\bar{1}$ (No. 2)                                                                                                    |
| <i>a</i> , Å                                                     | 13.8298(5)                                                                    | 12.6621(14)                                                                                                                   |
| <i>b</i> , Å                                                     | 21.0139(8)                                                                    | 15.0147(13)                                                                                                                   |
| <i>c</i> , Å                                                     | 11.6755(4)                                                                    | 15.5219(17)                                                                                                                   |
| $\alpha$ , deg.                                                  | —                                                                             | 79.207(7)                                                                                                                     |
| $\beta$ , deg.                                                   | 91.249(6)                                                                     | 88.564(8)                                                                                                                     |
| $\gamma$ , deg.                                                  | —                                                                             | 74.747(7)                                                                                                                     |
| <i>V</i> , Å <sup>3</sup>                                        | 3392.3(2)                                                                     | 2795.8(5)                                                                                                                     |
| <i>Z</i>                                                         | 2                                                                             | 1                                                                                                                             |
| <i>D</i> <sub>calcd</sub> , g/cm <sup>-3</sup>                   | 1.395                                                                         | 1.731                                                                                                                         |
| $\mu$ [Mo- <i>K</i> $\alpha$ ], cm <sup>-1</sup>                 | 30.979                                                                        | 26.898                                                                                                                        |
| <i>T</i> , K                                                     | 113                                                                           | 113                                                                                                                           |
| crystal size, mm                                                 | 0.17 × 0.10 × 0.07                                                            | 0.36 × 0.17 × 0.16                                                                                                            |
| $\theta$ range for data collection (deg.)                        | 3.00 to 27.60                                                                 | 3.10 to 27.50                                                                                                                 |
| no. of reflections measured                                      | 7413                                                                          | 52878                                                                                                                         |
| unique data ( <i>R</i> <sub>int</sub> )                          | 7413 (0.0980)                                                                 | 12842 (0.0573)                                                                                                                |
| data / restraints / parameters                                   | 7413 / 0 / 403                                                                | 12842 / 0 / 770                                                                                                               |
| <i>R</i> 1 ( <i>I</i> > 2.0 $\sigma$ ( <i>I</i> )) <sup>a</sup>  | 0.0711                                                                        | 0.0664                                                                                                                        |
| <i>wR</i> 2 ( <i>I</i> > 2.0 $\sigma$ ( <i>I</i> )) <sup>b</sup> | 0.1864                                                                        | 0.1733                                                                                                                        |
| <i>R</i> 1 (all data) <sup>a</sup>                               | 0.1459                                                                        | 0.0798                                                                                                                        |
| <i>wR</i> 2 (all data) <sup>b</sup>                              | 0.2441                                                                        | 0.1827                                                                                                                        |
| GOF on <i>F</i> <sup>2</sup>                                     | 1.159                                                                         | 1.049                                                                                                                         |
| $\Delta\rho$ , e Å <sup>-3</sup>                                 | 2.57, -2.08                                                                   | 8.53, -7.16                                                                                                                   |

*a*)  $R1 = (\sum||Fo| - |Fc||)/(\sum|Fo|)$     *b*)  $wR2 = [\{\sum w(Fo^2 - Fc^2)^2\}/\{\sum w(Fo^4)\}]^{1/2}$

**Table S2.** Crystal Data and Data Collection Parameters of Complexes **5a** and **6a**

|                                                                  | <b>5a</b>                                                                                                                     | <b>6a</b>                                                                                                      |
|------------------------------------------------------------------|-------------------------------------------------------------------------------------------------------------------------------|----------------------------------------------------------------------------------------------------------------|
| empirical formula                                                | C <sub>126</sub> H <sub>102</sub> B <sub>2</sub> F <sub>40</sub> Hf <sub>2</sub> N <sub>2</sub> O <sub>2</sub> P <sub>2</sub> | C <sub>130</sub> H <sub>100</sub> B <sub>2</sub> F <sub>40</sub> Hf <sub>2</sub> N <sub>6</sub> O <sub>2</sub> |
| formula weight                                                   | 2876.69                                                                                                                       | 2916.79                                                                                                        |
| crystal system                                                   | <i>triclinic</i>                                                                                                              | <i>triclinic</i>                                                                                               |
| space group                                                      | <i>P</i> $\bar{1}$ (No. 2)                                                                                                    | <i>P</i> $\bar{1}$ (No. 2)                                                                                     |
| <i>a</i> , Å                                                     | 12.937(3)                                                                                                                     | 13.6112(17)                                                                                                    |
| <i>b</i> , Å                                                     | 14.2819(18)                                                                                                                   | 16.6645(15)                                                                                                    |
| <i>c</i> , Å                                                     | 19.054(4)                                                                                                                     | 17.442(2)                                                                                                      |
| $\alpha$ , deg.                                                  | 71.294(18)                                                                                                                    | 62.030(8)                                                                                                      |
| $\beta$ , deg.                                                   | 74.826(19)                                                                                                                    | 78.174(12)                                                                                                     |
| $\gamma$ , deg.                                                  | 75.655(19)                                                                                                                    | 71.120(10)                                                                                                     |
| <i>V</i> , Å <sup>3</sup>                                        | 3166(12)                                                                                                                      | 3299.5(8)                                                                                                      |
| <i>Z</i>                                                         | 1                                                                                                                             | 1                                                                                                              |
| <i>D</i> <sub>calcd</sub> , g/cm <sup>-3</sup>                   | 1.509                                                                                                                         | 1.468                                                                                                          |
| $\mu$ [Mo- <i>K</i> $\alpha$ ], cm <sup>-1</sup>                 | 17.691                                                                                                                        | 16.766                                                                                                         |
| <i>T</i> , K                                                     | 113                                                                                                                           | 113                                                                                                            |
| crystal size, mm                                                 | 0.20 $\times$ 0.12 $\times$ 0.08                                                                                              | 0.15 $\times$ 0.01 $\times$ 0.01                                                                               |
| $\theta$ range for data collection (deg.)                        | 3.10 to 27.30                                                                                                                 | 3.00 to 25.20                                                                                                  |
| no. of reflections measured                                      | 57659                                                                                                                         | 28337                                                                                                          |
| unique data ( <i>R</i> <sub>int</sub> )                          | 14458 (0.2094)                                                                                                                | 14187 (0.1337)                                                                                                 |
| data / restraints / parameters                                   | 14458 / 0 / 793                                                                                                               | 14187 / 0 / 820                                                                                                |
| <i>R</i> 1 ( <i>I</i> > 2.0 $\sigma$ ( <i>I</i> )) <sup>a</sup>  | 0.0963                                                                                                                        | 0.0754                                                                                                         |
| <i>wR</i> 2 ( <i>I</i> > 2.0 $\sigma$ ( <i>I</i> )) <sup>b</sup> | 0.2241                                                                                                                        | 0.1644                                                                                                         |
| <i>R</i> 1 (all data) <sup>a</sup>                               | 0.1548                                                                                                                        | 0.1227                                                                                                         |
| <i>wR</i> 2 (all data) <sup>b</sup>                              | 0.2512                                                                                                                        | 0.1954                                                                                                         |
| GOF on <i>F</i> <sup>2</sup>                                     | 0.951                                                                                                                         | 1.064                                                                                                          |
| $\Delta\rho$ , e Å <sup>-3</sup>                                 | 8.65, -2.71                                                                                                                   | 1.74, -2.55                                                                                                    |

*a*)  $R1 = (\sum||Fo| - |Fc||)/(\sum|Fo|)$     *b*)  $wR2 = [\{\sum w(Fo^2 - Fc^2)^2\}/\{\sum w(Fo^4)\}]^{1/2}$

## 2. $^1\text{H}$ and $^{13}\text{C}\{^1\text{H}\}$ NMR Spectra of (2-Hydroxyethylene)amine

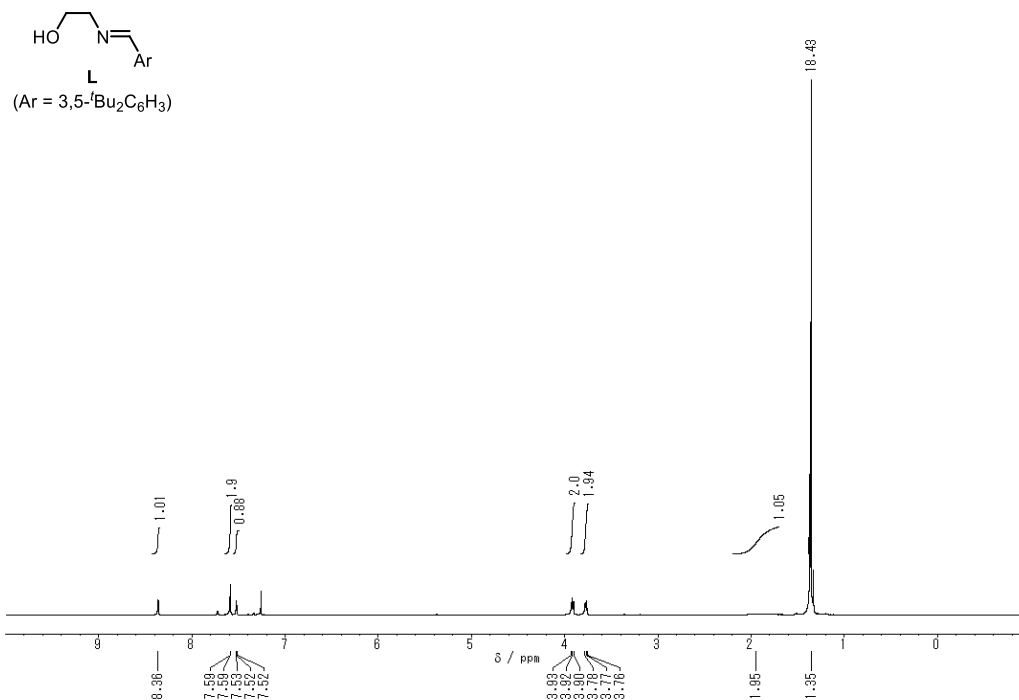

**Figure S1.**  $^1\text{H}$  NMR spectrum of pro-ligand **L** in  $\text{CDCl}_3$ .

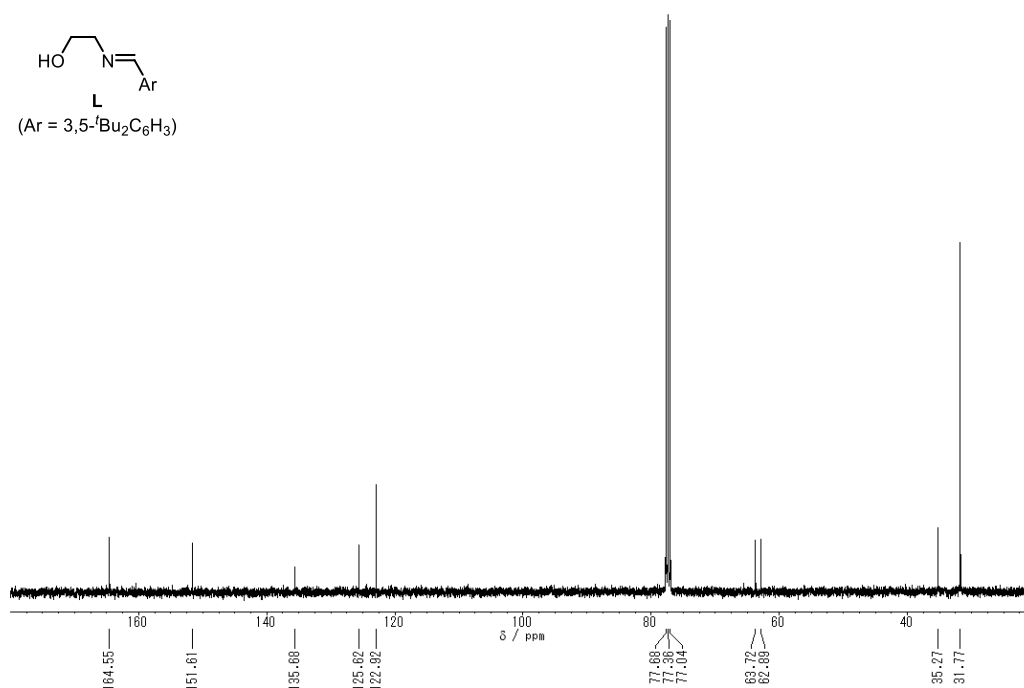

**Figure S2.**  $^{13}\text{C}\{^1\text{H}\}$  NMR spectrum of pro-ligand **L** in  $\text{CDCl}_3$ .

### 3. $^1\text{H}$ and $^{13}\text{C}\{^1\text{H}\}$ NMR Spectra of Hafnium Complexes

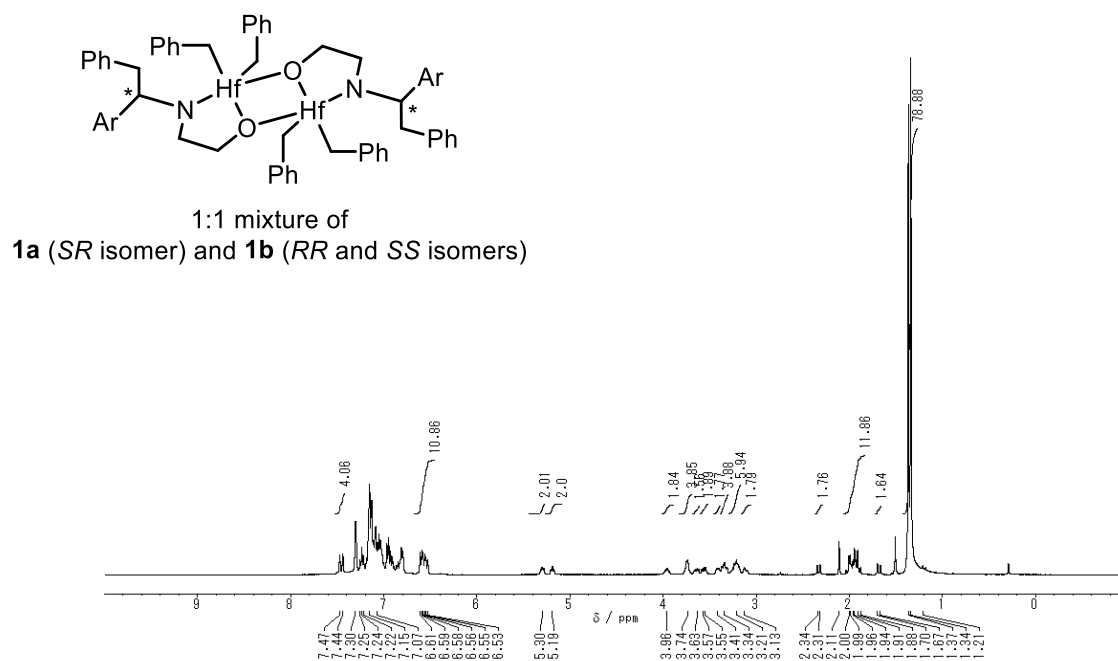

**Figure S3.**  $^1\text{H}$  NMR spectrum of mixture of the mixture of **1a** and **1b** in  $\text{C}_6\text{D}_6$ .

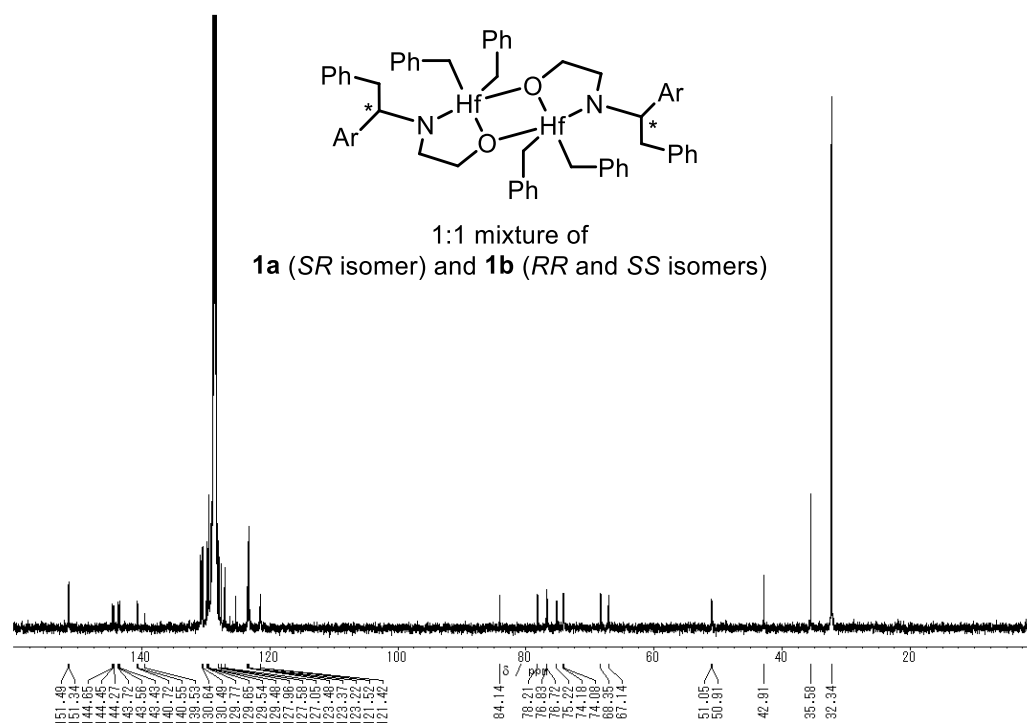

**Figure S4.**  $^{13}\text{C}\{^1\text{H}\}$  NMR spectrum of the mixture of **1a** and **1b** in  $\text{C}_6\text{D}_6$ .

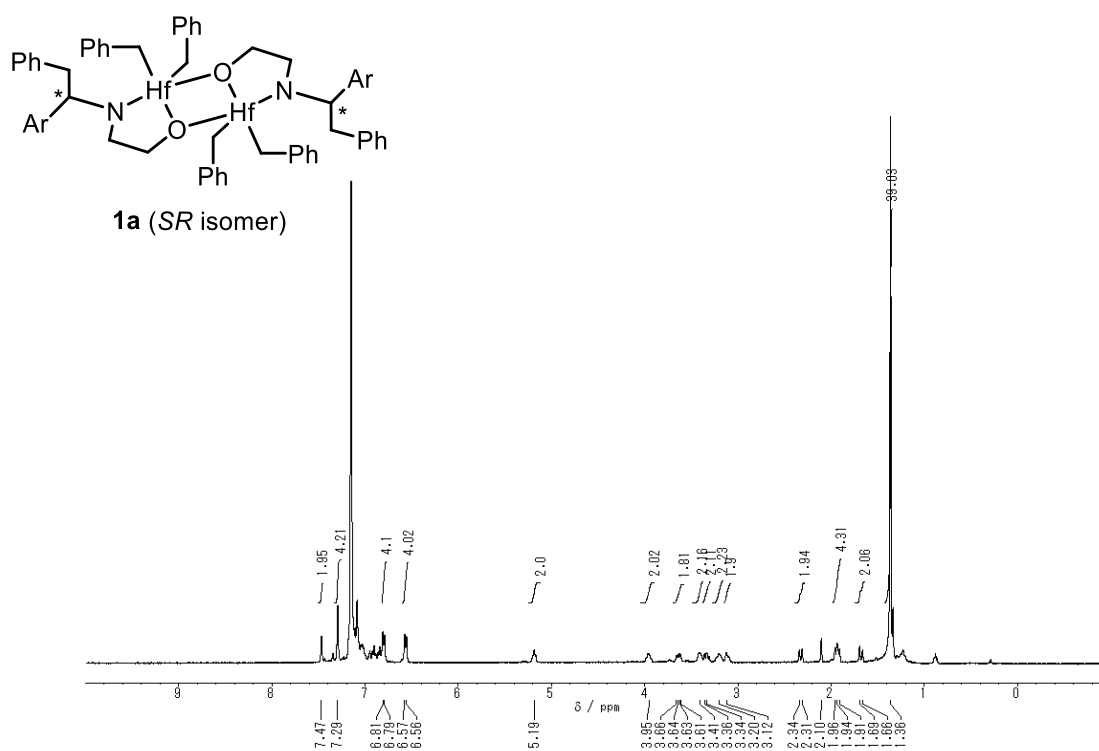

**Figure S5.**  $^1\text{H}$  NMR spectrum of complex **1a** in  $\text{C}_6\text{D}_6$ .

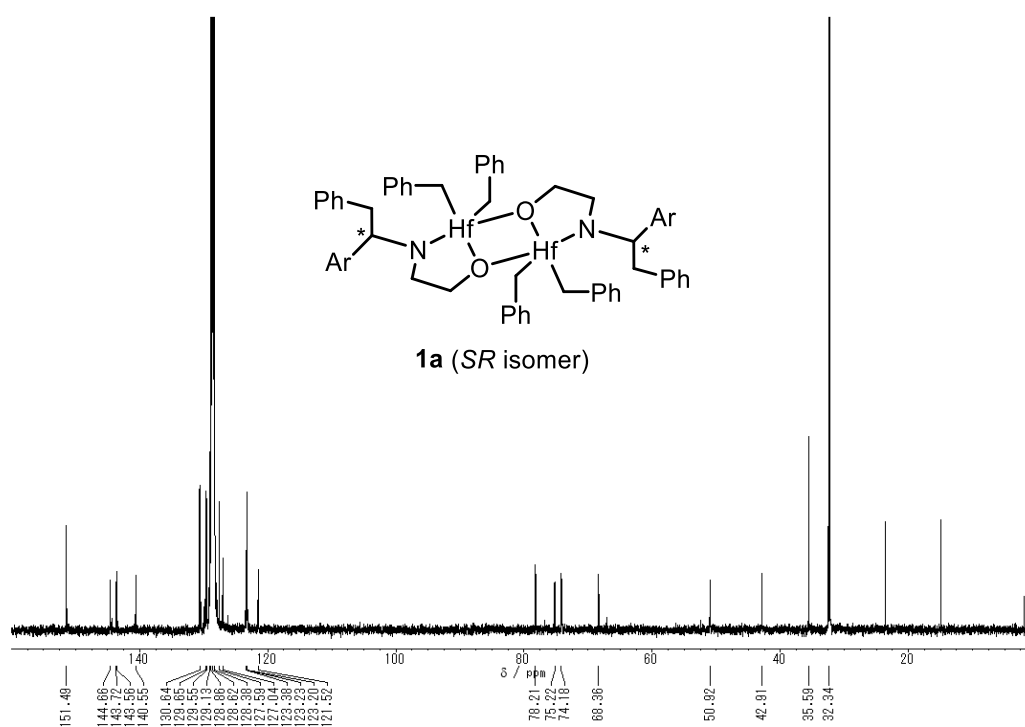

**Figure S6.**  $^{13}\text{C}\{^1\text{H}\}$  NMR spectrum of complex **1a** in  $\text{C}_6\text{D}_6$ .

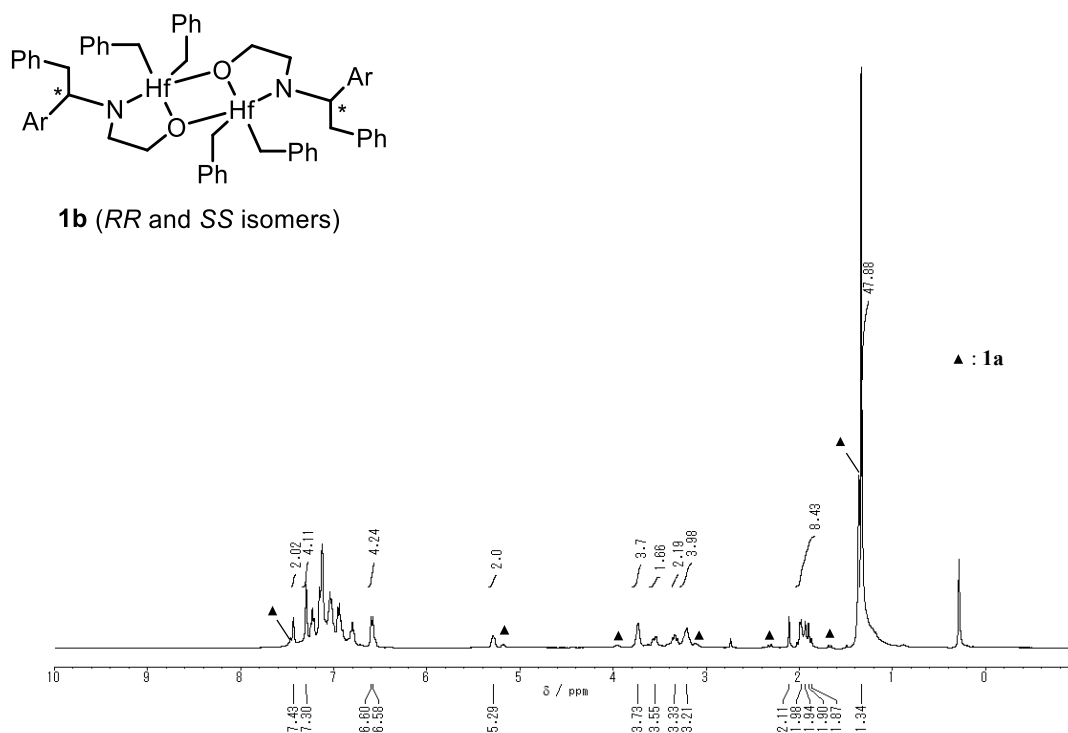

**Figure S7.**  $^1\text{H}$  NMR spectrum of complex **1b** in  $\text{C}_6\text{D}_6$ .

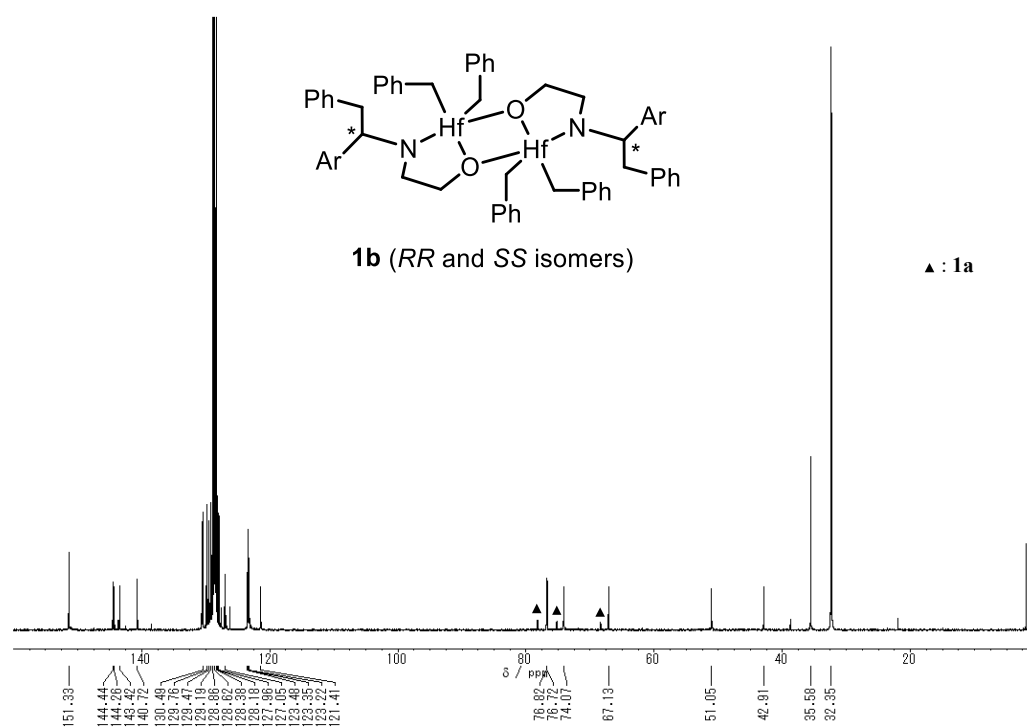

**Figure S8.**  $^{13}\text{C}\{^1\text{H}\}$  NMR spectrum of complex **1b** in  $\text{C}_6\text{D}_6$ .



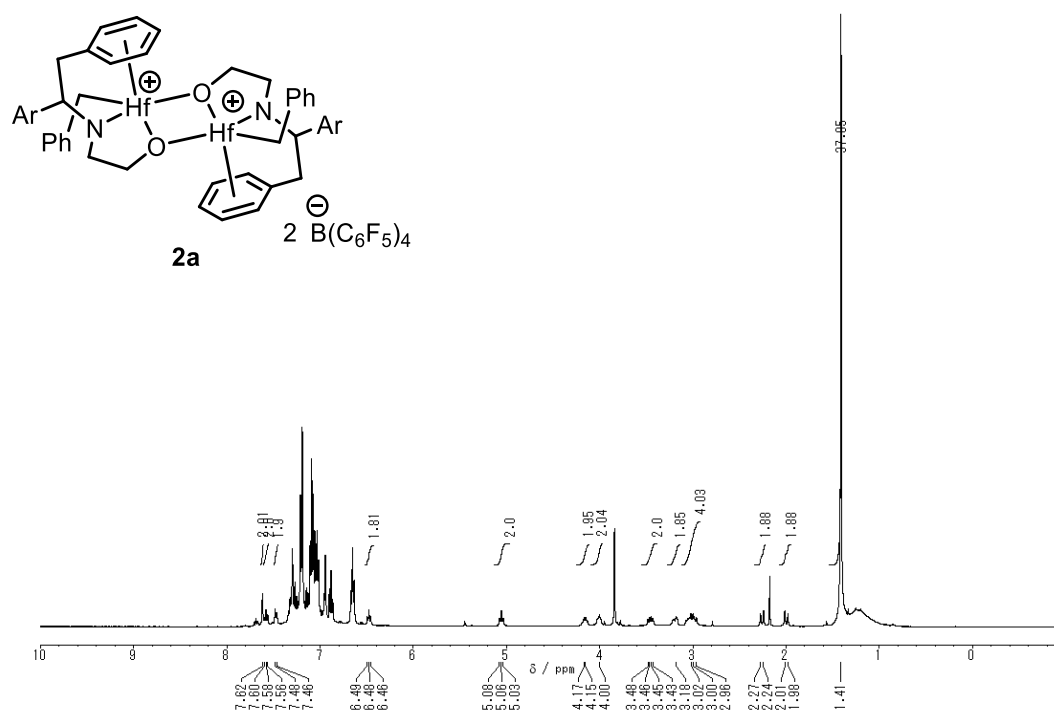

**Figure S9.**  $^1\text{H}$  NMR spectrum of complex **2a** in  $\text{C}_6\text{D}_5\text{Br}$ .

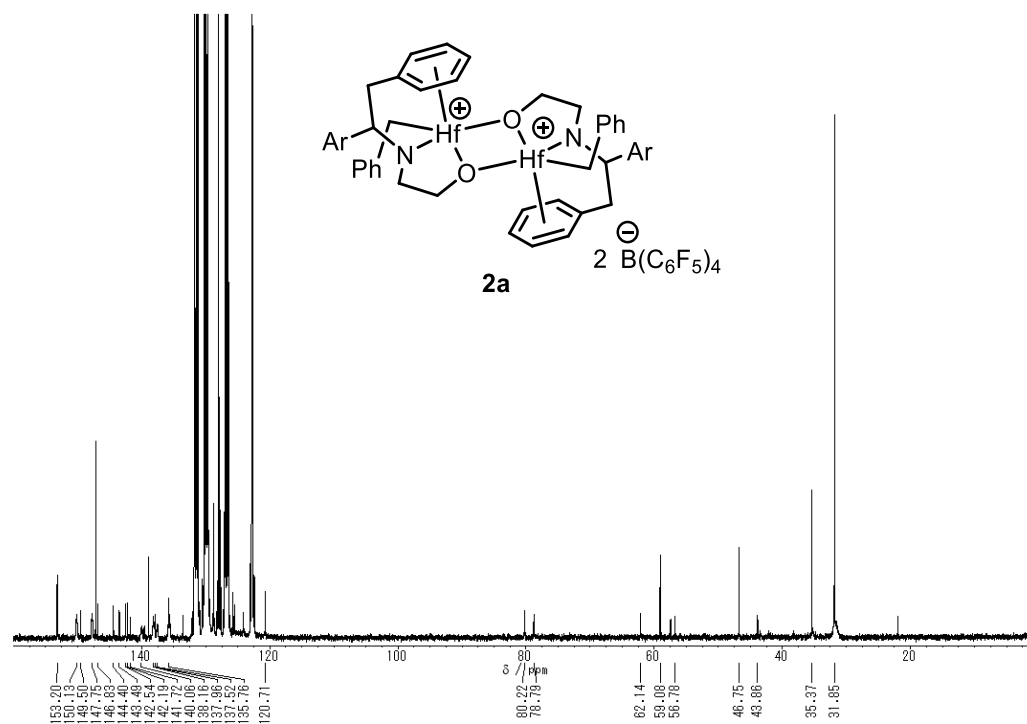

**Figure S10.**  $^{13}\text{C}\{^1\text{H}\}$  NMR spectrum of complex **2a** in  $\text{C}_6\text{D}_5\text{Br}$ .

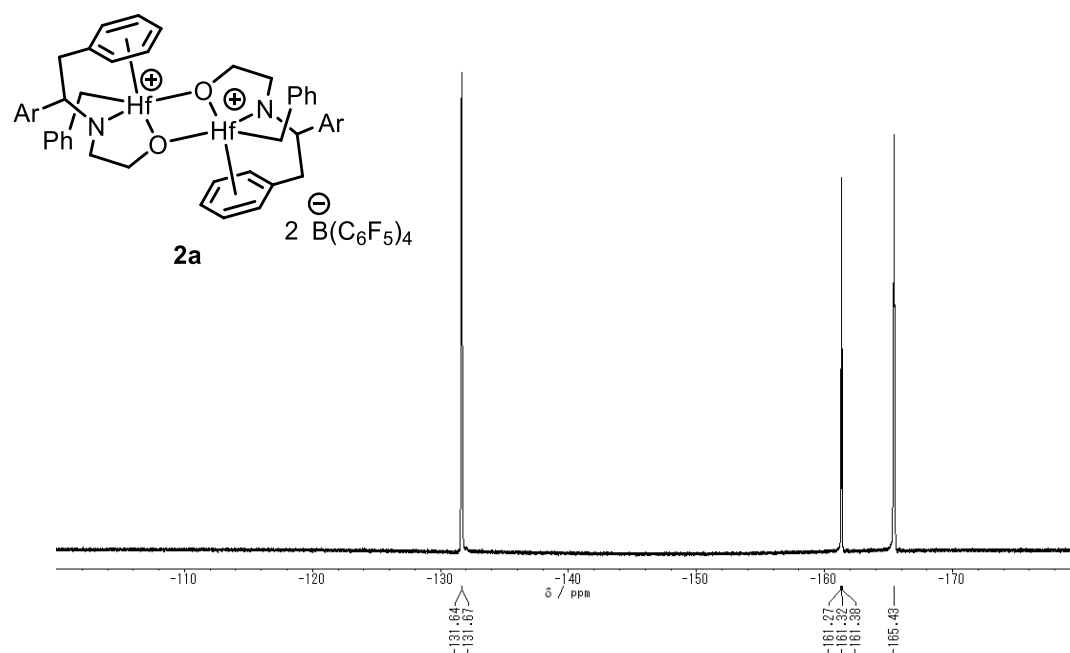

**Figure S11.**  $^{19}\text{F}$  NMR spectrum of complex **2a** in  $\text{C}_6\text{D}_5\text{Br}$ .

#### 4. 1-Hexene Oligomerization

**General Procedure for Oligomerization of 1-Hexene:** Complex **1a** (7.1 mg, 5.0  $\mu\text{mol}$ , 0.2 mol%) was dissolved in bromobenzene (0.3 mL), and 1-hexene (210.2 mg, 2.50 mmol) was added.  $[\text{Ph}_3\text{C}][\text{B}(\text{C}_6\text{F}_5)_4]$  (9.2 mg, 10.0  $\mu\text{mol}$ , 0.4 mol%) was subsequently added. The reaction mixture was kept at designated temperature for the time period as shown the table. Methanol was added to quench the reaction mixture. After removing all the volatile, the residue was dissolved in hexane, and the solution was passed through pad of silica gel. Oligomer of 1-hexene was obtained by evaporating the solvent to dryness.

**Table S3.** Oligomerization of 1-Hexene Catalyzed by Complex **1a**

| entry          | cocatalyst                                                | temp.<br>[°C] | time<br>[h] | yield <sup>a</sup><br>[%] | $M_n^b$<br>( $\times 10^3$ ) | $M_w^b$<br>( $\times 10^3$ ) | $M_w/M_n$ |
|----------------|-----------------------------------------------------------|---------------|-------------|---------------------------|------------------------------|------------------------------|-----------|
| 1              | $[\text{Ph}_3\text{C}][\text{B}(\text{C}_6\text{F}_5)_4]$ | rt            | 20          | n.r. <sup>c</sup>         | —                            | —                            | —         |
| 2              | $[\text{Ph}_3\text{C}][\text{B}(\text{C}_6\text{F}_5)_4]$ | 80            | 20          | 47                        | 1.02                         | 1.21                         | 1.19      |
| 3              | $[\text{Ph}_3\text{C}][\text{B}(\text{C}_6\text{F}_5)_4]$ | 100           | 20          | 78                        | 0.81                         | 1.02                         | 1.26      |
| 4              | $[\text{Ph}_3\text{C}][\text{B}(\text{C}_6\text{F}_5)_4]$ | 100           | 10          | 48                        | 0.82                         | 0.98                         | 1.20      |
| 5 <sup>d</sup> | $[\text{Ph}_3\text{C}][\text{B}(\text{C}_6\text{F}_5)_4]$ | 100           | 20          | trace                     | —                            | —                            | —         |
| 6              | $\text{B}(\text{C}_6\text{F}_5)_3$                        | 120           | 20          | trace                     | —                            | —                            | —         |

<sup>a</sup> Isolated yield. <sup>b</sup> Determined by GPC. <sup>c</sup> No reaction. <sup>d</sup> Performed with 0.2 mol% of cocatalyst.

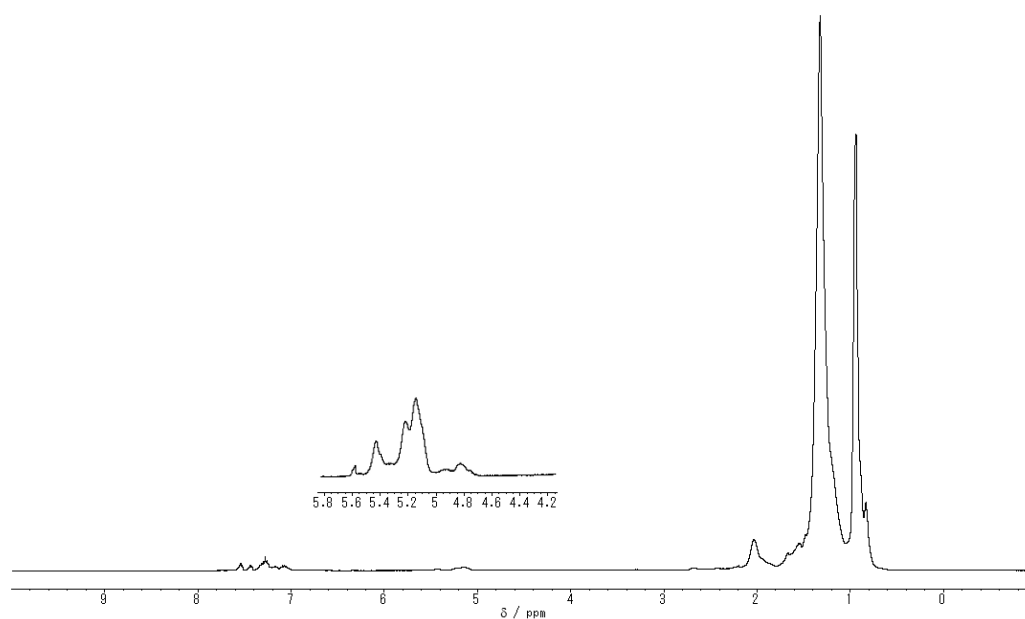

**Figure S12.**  $^1\text{H}$  NMR spectrum of 1-hexene oligomer in  $\text{CDCl}_3$ .

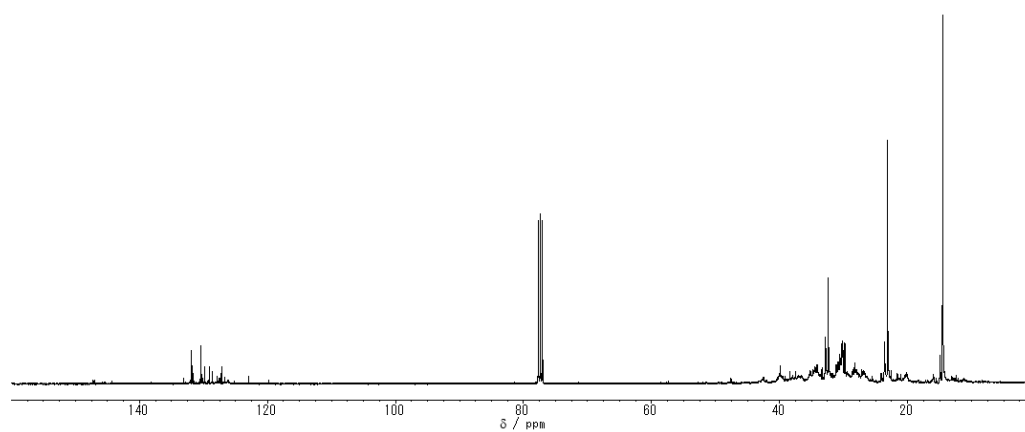

**Figure S13.**  $^{13}\text{C}\{^1\text{H}\}$  NMR spectrum of 1-hexene oligomer in  $\text{CDCl}_3$ .

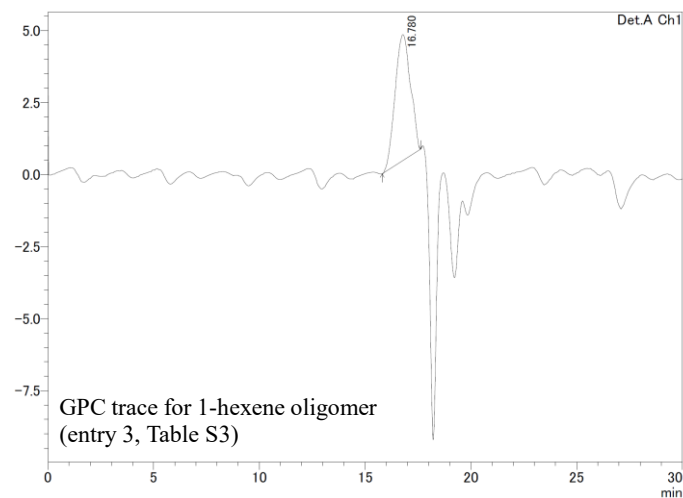

GPC trace (expanded) with calibration line

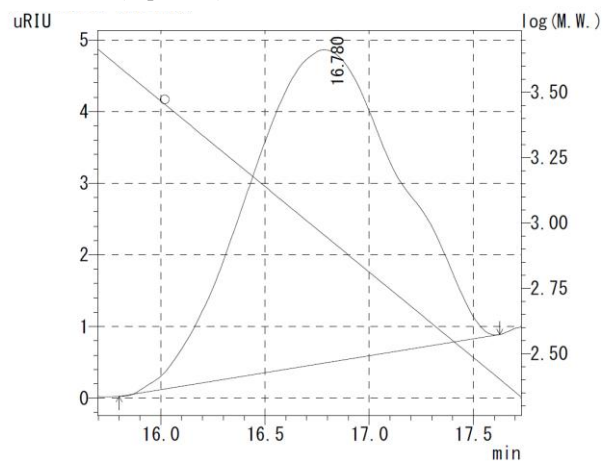

Peak Information

|     | Retention time | Area   | Height | Area%   | Height% |
|-----|----------------|--------|--------|---------|---------|
| 1   | 16.780         | 220815 | 4375   | 100.000 | 100.000 |
| Sum |                | 220815 | 4375   | 100.000 | 100.000 |

Molecular weight calculation

| Peak Information |            |           |      |       |
|------------------|------------|-----------|------|-------|
|                  | time (min) | flow (mL) | MW   | hight |
| Start            | 15.800     | 12.640    | 3955 | 25    |
| Peak top         | 16.780     | 13.424    | 901  | 4375  |
| end              | 17.625     | 14.100    | 252  | 887   |

area : 220815  
area % : 100.0000

Average molecular weight

|       |         |
|-------|---------|
| Mn    | 811     |
| Mw    | 1018    |
| Mz    | 1265    |
| Mw/Mn | 1.25598 |
| Mv/Mn | 0.00000 |
| Mz/Mw | 1.24242 |

**Figure S14.** GPC trace of 1-hexene oligomer for entry 3 in Table S3.

## 5. $^1\text{H}$ and $^{13}\text{C}\{^1\text{H}\}$ NMR Spectra of Alkene **3**

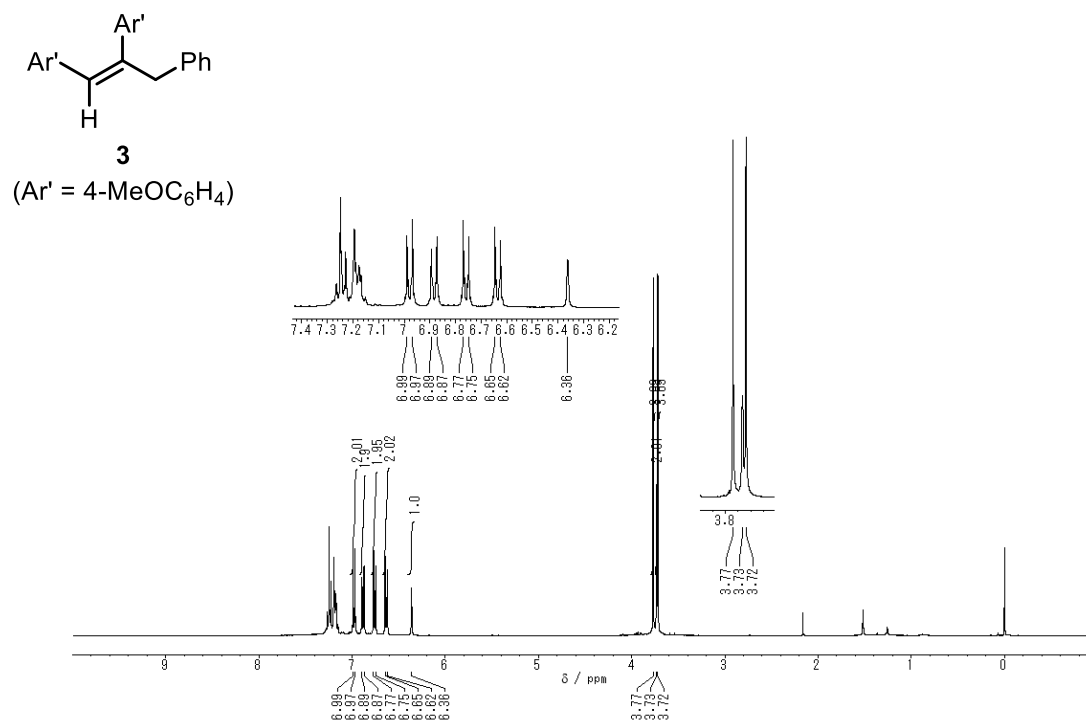

**Figure S15.**  $^1\text{H}$  NMR spectrum of trisubstituted alkene **3** in  $\text{CDCl}_3$ .

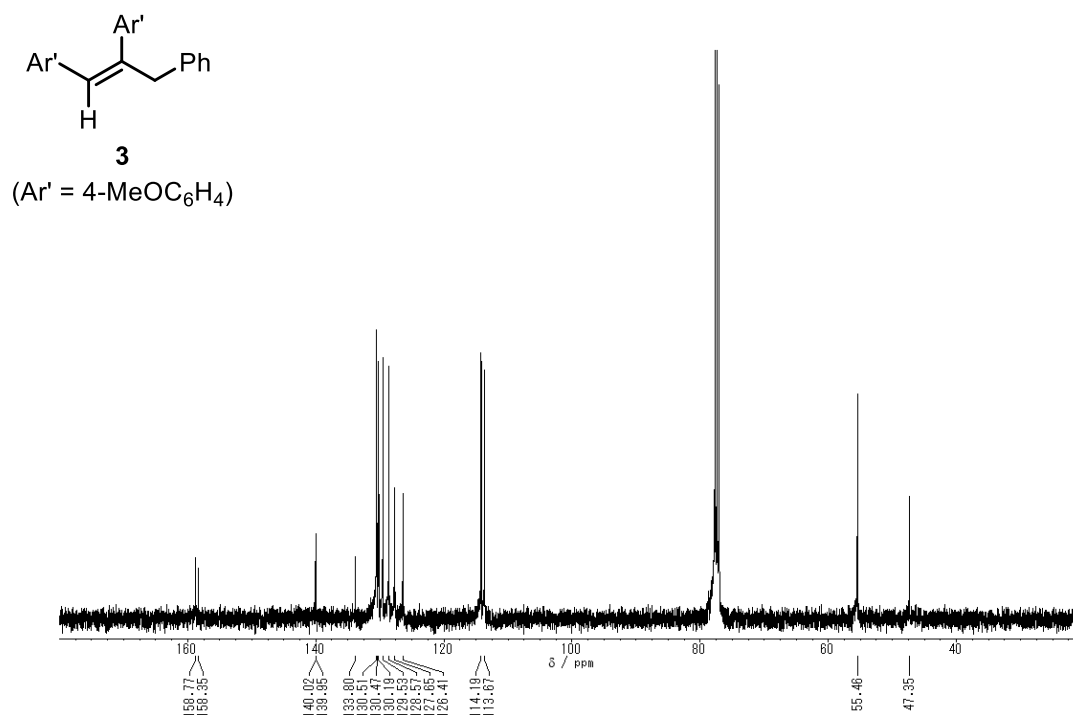

**Figure S16.**  $^{13}\text{C}\{^1\text{H}\}$  NMR spectrum of trisubstituted alkene **3** in  $\text{CDCl}_3$ .

## References

- (S1) Altomare, A., Casciarano, G., Giacovazzo, C. and Guagliardi, A. Completion and refinement of crystal structures with SIR92. *J. Appl. Cryst.* **1993**, 26, 343–350.
- (S2) Sheldrick, G. M. *Acta Cryst.* **2014**, A70, C1437.
- (S3) *CrystalClear: Data Collection and Processing Software*, Rigaku Corporation, 1998–2015, Tokyo 196–8666, Japan.
- (S4) Sheldrick, G. M. A Short History of SHELX. *Acta Cryst.* **2008**, A64, 112–122.
- (S5) van der Sluis, P.; Spek, A. L. BYPASS: an Effective Method for the Refinement of Crystal Structures Containing Disordered Solvent Regions. *Acta Cryst.* **1990**, A46, 194–201.
- (S6) Farrugia, L. J. ORTEP-3 for Windows – a Version of ORTEP-III with a Graphical User Interface (GUI). *J. Appl. Crystallogr.* **1997**, 30, 565.
